# Supplementary material for: Genome-wide analysis of transcriptome and histone modifications in Brassica napus hybrid
Source: Front Plant Sci. 2023 Jan 27;14:1123729. doi: 10.3389/fpls.2023.1123729 (PMC9911877; doi:10.3389/fpls.2023.1123729)
Supplement: Supplementary file 2 [file Table_1.xlsx]

## Sheet: Table S1
Table S1. Preliminary quality analysis of ChIP-seq data.
FRIP, the fraction of reads that in peak regions; NSC, normalized strand coefficient; RSC, relative strand correlation; R, Pearson's correlation coefficient.
Factor	Tissue	Repeat	Raw reads	Clean reads	Mapped reads	Mapping rate	Peak No.	FRiP	NSC	RSC	R	Overlapped peak No.
H3K4me3	seedling	Repeat 1	25725440	25335556	23052639	0.9098	47545	0.8557	2.60537	1.04798	0.98	46820
		Repeat 2	32484828	32016230	29608804	0.9248	48825	0.85	2.54906	1.06036		46571
	flower bud	Repeat 1	27589776	27230696	27073056	0.9942	43634	0.8638	2.8759	1.18012	0.98	42189
		Repeat 2	28651300	28018674	27911152	0.9961	43148	0.842	2.66177	1.17876		42298
	silique	Repeat 1	42432590	41691280	41223620	0.9887	43010	0.8249	2.36772	1.19475	0.98	42685
		Repeat 2	32049144	31624116	31033998	0.9813	44073	0.877	2.93072	1.06536		42029
H3K27me3	seedling	Repeat 1	26836912	26342044	12676734	0.4812	22966	0.4791	1.3986	0.778591	0.98	17389
		Repeat 2	26991204	26525404	12957517	0.4884	20339	0.3845	1.34321	0.719529		18340
	flower bud	Repeat 1	43657336	43076916	39099200	0.9076	25956	0.5322	1.31039	1.09407	0.98	24474
		Repeat 2	36693292	35915752	33964959	0.9456	25589	0.654	1.36149	1.10919		22828
	silique	Repeat 1	36873760	36232336	28057437	0.7743	23978	0.4963	1.3277	1.05803	0.98	11639
		Repeat 2	15806668	15144288	8091274	0.5342	13579	0.2809	1.28782	0.812		13508

## Sheet: Table S2
Table S2. Preliminary quality analysis of RNA-seq data.
Tissue	Repeat	Raw reads	Clean reads	Mapped reads	Mapping rate	Unique	Unique rate /clean%	R
seedling	Repeat 1	38936536	38202290	36061053	0.944	27584974	0.7221	0.94
	Repeat 2	8412376	8324514	7890665	0.9479	4666332	0.5606
flower bud	Repeat 1	19431230	18973086	17841155	0.9403	14198648	0.7484	0.99
	Repeat 2	19469574	19036866	17889532	0.9397	14138088	0.7427
silique	Repeat 1	19684144	19267420	18154814	0.9423	14117462	0.7327	0.99
	Repeat 2	16023626	15638572	14701026	0.94	11648124	0.7448

## Sheet: Table S3
Table S3. Numbers of differentially histone-modified regions anmog hybrid and parents.
Sample	peak_type	genome_An	genome_Cn	Total
H3K4me3.B409_seedling_vs_2063A_seedling	down	2206	2108	4319
H3K4me3.B409_seedling_vs_2063A_seedling	no significant	20567	23817	44416
H3K4me3.B409_seedling_vs_2063A_seedling	up	1587	2381	3978
H3K4me3.B409_flower_vs_2063A_flower	down	1883	1691	3576
H3K4me3.B409_flower_vs_2063A_flower	no significant	18961	21633	40627
H3K4me3.B409_flower_vs_2063A_flower	up	1504	2183	3698
H3K4me3.B409_silique_vs_2063A_silique	down	2490	2209	4701
H3K4me3.B409_silique_vs_2063A_silique	no significant	17772	20733	38540
H3K4me3.B409_silique_vs_2063A_silique	up	2042	2509	4560
H3K27me3.B409_seedling_vs_2063A_seedling	down	2353	1980	4340
H3K27me3.B409_seedling_vs_2063A_seedling	no significant	11051	12924	23996
H3K27me3.B409_seedling_vs_2063A_seedling	up	1789	2419	4226
H3K27me3.B409_flower_vs_2063A_flower	down	2039	1739	3788
H3K27me3.B409_flower_vs_2063A_flower	no significant	10771	12107	22898
H3K27me3.B409_flower_vs_2063A_flower	up	1322	1854	3186
H3K27me3.B409_silique_vs_2063A_silique	down	1796	1473	3278
H3K27me3.B409_silique_vs_2063A_silique	no significant	11152	12759	23927
H3K27me3.B409_silique_vs_2063A_silique	up	1569	1868	3448
H3K4me3.HZ62_seedling_vs_2063A_seedling	down	1037	1120	2161
H3K4me3.HZ62_seedling_vs_2063A_seedling	no significant	22433	25327	47797
H3K4me3.HZ62_seedling_vs_2063A_seedling	up	1173	2126	3307
H3K4me3.HZ62_flower_vs_2063A_flower	down	450	375	825
H3K4me3.HZ62_flower_vs_2063A_flower	no significant	20900	23318	44257
H3K4me3.HZ62_flower_vs_2063A_flower	up	684	1548	2239
H3K4me3.HZ62_silique_vs_2063A_silique	down	308	286	594
H3K4me3.HZ62_silique_vs_2063A_silique	no significant	20750	23276	44066
H3K4me3.HZ62_silique_vs_2063A_silique	up	708	1167	1879
H3K27me3.HZ62_seedling_vs_2063A_seedling	down	332	204	538
H3K27me3.HZ62_seedling_vs_2063A_seedling	no significant	13921	15469	29420
H3K27me3.HZ62_seedling_vs_2063A_seedling	up	696	1254	1956
H3K27me3.HZ62_flower_vs_2063A_flower	down	388	276	664
H3K27me3.HZ62_flower_vs_2063A_flower	no significant	13428	14826	28254
H3K27me3.HZ62_flower_vs_2063A_flower	up	736	1453	2189
H3K27me3.HZ62_silique_vs_2063A_silique	down	184	144	328
H3K27me3.HZ62_silique_vs_2063A_silique	no significant	12316	13238	25554
H3K27me3.HZ62_silique_vs_2063A_silique	up	364	707	1071
H3K4me3.HZ62_seedling_vs_B409_seedling	down	412	522	937
H3K4me3.HZ62_seedling_vs_B409_seedling	no significant	22712	26237	48990
H3K4me3.HZ62_seedling_vs_B409_seedling	up	1030	1234	2265
H3K4me3.HZ62_flower_vs_B409_flower	down	566	707	1278
H3K4me3.HZ62_flower_vs_B409_flower	no significant	20486	23334	43862
H3K4me3.HZ62_flower_vs_B409_flower	up	841	1076	1917
H3K4me3.HZ62_silique_vs_B409_silique	down	965	1167	2137
H3K4me3.HZ62_silique_vs_B409_silique	no significant	19776	22658	42475
H3K4me3.HZ62_silique_vs_B409_silique	up	1286	1413	2699
H3K27me3.HZ62_seedling_vs_B409_seedling	down	214	320	535
H3K27me3.HZ62_seedling_vs_B409_seedling	no significant	12171	13804	26011
H3K27me3.HZ62_seedling_vs_B409_seedling	up	780	754	1537
H3K27me3.HZ62_flower_vs_B409_flower	down	473	495	971
H3K27me3.HZ62_flower_vs_B409_flower	no significant	12527	14299	26855
H3K27me3.HZ62_flower_vs_B409_flower	up	1003	1012	2018
H3K27me3.HZ62_silique_vs_B409_silique	down	396	469	868
H3K27me3.HZ62_silique_vs_B409_silique	no significant	13107	14703	27836
H3K27me3.HZ62_silique_vs_B409_silique	up	786	797	1586

## Sheet: Table S4
Table S4. The number of differentially-modified regions in hybrid compared with MPV .
Sample	peak_type	genome_An	genome_Cn	Total
seedling.H3K4me3	down	240	224	465
seedling.H3K4me3	no significant	24548	28380	52976
seedling.H3K4me3	up	115	290	406
seedling.H3K27me3	down	0	2	2
seedling.H3K27me3	no significant	15228	17382	32656
seedling.H3K27me3	up	0	19	19
flower.H3K4me3	down	49	69	118
flower.H3K4me3	no significant	22398	25578	48024
flower.H3K4me3	up	18	69	87
flower.H3K27me3	down	17	9	28
flower.H3K27me3	no significant	14715	16652	31406
flower.H3K27me3	up	6	89	95
silique.H3K4me3	down	177	212	390
silique.H3K4me3	no significant	22209	25277	47531
silique.H3K4me3	up	60	152	212
silique.H3K27me3	down	5	11	17
silique.H3K27me3	no significant	14728	16402	31165
silique.H3K27me3	up	3	32	35

## Sheet: Table S5
Table S5. The primer sequence of qRT-PCR .
Gene description/ID	Primer sequence
GWD1 (ZS11A09G059080)	CTTCCTAGTCCGGTACAAAC
	GGCTGTACCTTTTCCATCACC
GWD1 (ZS11C08G025260)	CTAGTCGCACCCTCAGAACT
	GAAGTACGCTCTCTCGTTCC
GWD3 (ZS11A09G005180	CCTCCTCCACCATTGAGGAACA
	CCTTCCAGGAACCGATCTCTT
GWD3 (ZS11C02G062500	ACTTGCTCTGCTTCTTCCTCCA
	CCAATCTCTTCAGCTGAGCC
GWD3 (ZS11C09G005880)	CGACGTTGGTGGTGATAATGG
	AGCTGAGCCTTCAAGACCAC
LDA (ZS11C09G071590)	TGATCCTTATGCACGAGGGC
	GAGTAGGATCTTAGGCATGGC
UBC10 (ZS11C09G043670)	GAAGACATGTTTCATTGGCAGGC
	CTTAGGAGGTTTGAAAGGGTAATCA
